# Supplementary material for: Clustering and classification of early knee osteoarthritis using machine-learning analysis of step-up and down test kinematics in recreational table tennis players
Source: PeerJ. 2025 May 27;13:e19471. doi: 10.7717/peerj.19471 (PMC12124290; doi:10.7717/peerj.19471)
Supplement: Supplemental Information 1 [file peerj-13-19471-s001.xlsx]

## Sheet: U&D
ID	Age	Height	Weight	BMI	Sex	Sex	1OA/0cont	AB KCA	AD KCA	UP_P	UP_F	UP_K	UP_L	UP_A	DW_P	DW_F	DW_K	DW_L	DW_A
1	67	165	100	36.7309	1	M	1	13	7	11.4	11.14	7.25	6.35	0.62	7.73	6.11	5.16	4.79	1.72
2	67	165	100	36.7309	1	M	1	13	7	10.13	10.99	7.14	5.48	0.2	6.04	7.46	5.6	4.1	1.54
3	67	165	100	36.7309	1	M	1	13	7	9.38	9.14	7.25	5.15	0.01	7.97	6.28	5.98	5.54	1.2
4	64	173	66	22.0522	1	M	1	16	8	12.5	11.14	7.14	6.35	0.31	6.01	7.46	5.98	5.54	1.33
5	64	173	66	22.0522	1	M	1	16	8	11.24	9.91	7.25	5.51	0.2	6.04	6.11	5.16	4.85	1.2
6	64	173	66	22.0522	1	M	1	16	8	10.49	10.99	6.96	5.48	0.16	7.73	6.05	6.64	4.79	1.45
7	64	173	66	22.0522	1	M	0	9	3	8.7	7.7	4.81	2.71	0.06	4.4	5.64	3.38	3.24	0.89
8	64	173	66	22.0522	1	M	0	9	3	7.75	7.38	4.63	2.37	0.04	4.37	4.47	3.6	2.7	0.23
9	64	173	66	22.0522	1	M	0	9	3	6.46	7.72	4.16	2.4	0.01	4.8	4.83	3.91	3.53	0.59
10	49	171	60	20.5191	1	M	1	10	3	11.4	8.63	4.41	3.71	0.31	6.01	4.83	3.48	2.12	0.91
11	49	171	60	20.5191	1	M	1	10	3	10.13	9.01	4.5	4.02	0.16	5.97	4.66	2.36	1.24	0.09
12	49	171	60	20.5191	1	M	1	10	3	9.38	7.56	3.41	3.07	0.31	6.37	6.34	4.17	3.09	0.55
13	49	171	60	20.5191	1	M	0	3	0	6.04	8.98	2.87	2.16	0.05	2.03	3.23	5.16	4.1	1.72
14	49	171	60	20.5191	1	M	0	3	0	7.75	7.38	2.92	2.4	0.15	4	5.28	5.6	3.91	1.82
15	49	171	60	20.5191	1	M	0	3	0	4.23	5.2	5.49	3.82	0.06	5.16	5.8	5.98	4.22	1.69
16	44	170	69	23.8754	1	M	1	16	1	8.7	7.7	3.13	2.71	0.08	5.9	6.11	3.91	2.7	0.52
17	44	170	69	23.8754	1	M	1	16	1	6.68	7.98	4.81	4.33	0.5	4.45	4.47	2.88	2.15	0.24
18	44	170	69	23.8754	1	M	1	16	1	6.44	6.9	4.63	4.21	0.31	3.73	4.47	3.34	2.54	0.04
19	44	170	69	23.8754	1	M	1	9	8	9.49	9.91	7.14	5.48	0.62	5.56	7.46	3.38	4.79	0.3
20	44	170	69	23.8754	1	M	1	9	8	9.92	9.63	4.16	3.04	0.2	4.8	2.03	3.6	3.86	0.53
21	44	170	69	23.8754	1	M	1	9	8	8.98	9.73	4.16	3.25	0.01	5.05	5.46	7.96	5.54	0.97
22	42	171	78	26.6749	1	M	0	14	11	7.85	7.57	3.81	2.53	0.14	5.69	6.07	4.56	3.24	0.46
23	42	171	78	26.6749	1	M	0	14	11	6.95	6.07	2.56	1.84	0.04	1.94	1.1	0.23	0	0.01
24	42	171	78	26.6749	1	M	0	14	11	5.77	5.5	2.76	2.16	0.45	4.4	4.22	2.52	1.83	0.23
25	27	183	92	27.4717	1	M	1	14	10	9.32	8.23	4.61	3.45	0.01	3	2.09	1.45	1.41	1.33
26	27	183	92	27.4717	1	M	1	14	10	9.61	9.14	6.01	4.26	0.21	3.46	1.88	0.62	1.48	0.96
27	27	183	92	27.4717	1	M	1	14	10	8.72	7.72	4.14	2.86	0.01	3.75	1.69	0.15	0.08	0.71
28	27	183	92	27.4717	1	M	0	2	2	9.72	9.05	5.79	4.12	0.74	3	1.1	0.62	1.04	0.89
29	27	183	92	27.4717	1	M	0	2	2	8.32	8.29	6.4	4	0.11	3.94	1.87	1.07	1.04	0.89
30	43	170	74	25.6055	1	M	0	7	3	11.88	9.08	3.11	2.73	0.12	7.97	6.05	4.47	3.6	1.2
31	43	170	74	25.6055	1	M	0	7	3	11.4	5.77	3.15	4.39	0.56	5.28	4.71	3.68	2.7	1.54
32	43	170	74	25.6055	1	M	1	21	12	10.87	11.14	7.25	6.35	0.53	4.37	3.64	2.68	2.12	8.31
33	43	170	74	25.6055	1	M	1	21	12	11.88	10.99	7.14	5.48	0.53	5.69	4.71	3.68	3.6	1.72
34	27	170	74	25.6055	1	M	1	13	7	8.02	9.6	5.88	4.17	0.3	5.69	5.64	4.64	3.53	0.23
35	27	170	74	25.6055	1	M	1	13	7	10.04	10.99	5.64	3.88	0.2	3.74	3.84	4.4	2.95	0.5
36	27	170	74	25.6055	1	M	1	13	7	9.82	10.85	7.25	5.15	0.48	5	6.16	6.64	4.85	0.51
37	27	170	74	25.6055	1	M	0	14	9	5.65	5.19	3.15	2.37	0.6	2.21	2.07	1.7	1.3	0.22
38	27	170	74	25.6055	1	M	0	14	9	6.62	5.2	1.58	0.85	0.11	3	2.11	1.7	1.22	0.01
39	27	170	74	25.6055	1	M	0	14	9	5.75	4.66	2.34	1.47	0.29	3.62	4.04	4.54	3.36	0.58
40	39	154	46	19.3962	2	F	1	16	8	12.09	8.35	6.12	5.2	0.22	2.51	-5.84	-7.08	-6.1	-0.2
41	39	154	46	19.3962	2	F	1	16	8	11.88	7.7	5.79	4.17	0.12	2.21		0.62
42	39	154	46	19.3962	2	F	1	16	8	11.4	7.57	5.49	5.15	0.11	2.03		0.23
43	39	154	46	19.3962	2	F	0	9	3	11.98	9.07	4.6	2.35	0.12	1.75	-0.95	-2.4	-1.65	0.3
44	49	179	82	25.5922	1	M	1	13	7	10.24	9.47	3.29	2.22	0.26	5.64	6.52	7.99	4.65	0.43
45	49	179	82	25.5922	1	M	1	13	7	10.13	9.05	3.04	2.12	0.22	5.56	6.11	6.93	4.1	0.3
46	49	179	82	25.5922	1	M	1	13	7	10.3	9.63	3.15	2.32	0.2	5.14	6.28	7.03	4.22	0.27
47	49	179	82	25.5922	1	M	1	16	8	8.46	5.95	2.98	2.52	0.74	7.24	6.78	9.22	6.93	1.33
48	49	179	82	25.5922	1	M	1	16	8	8.98	6.07	3.13	2.71	0.71	7.97	6.68	9.33	6.83	1.54
49	49	179	82	25.5922	1	M	1	16	8	8.7	7.57	3.15	3.88	0.62	7.64	6.88	9.44	7.03	1.45
50	40	185	90	26.2966	1	M	1	21	12	10.87	11.14	7.25	6.35	0.53	4.37	3.64	2.68	2.12	8.31
51	40	185	90	26.2966	1	M	1	21	12	11.88	10.99	7.14	5.48	0.53	5.69	4.71	3.68	3.6	1.72
52	40	185	90	26.2966	1	M	1	21	12	10.24	9.47	3.29	2.22	0.26	5.64	6.52	7.99	4.65	0.43
53	40	185	90	26.2966	1	M	1	21	12	10.13	9.05	3.04	2.12	0.22	5.56	6.11	6.93	4.1	0.3
54	40	185	90	26.2966	1	M	1	21	12	10.3	9.63	3.15	2.32	0.2	5.14	6.28	7.03	4.22	0.27
55	53	161	58	22.3757	2	F	0	6	4	9.87	8.67	6.2	5.43	-0.17	4.59	4.36	4.18	3.87	1.53
56	53	161	58	22.3757	2	F	0	6	4	9.77	8.57	6.25	5.38	-0.16	4.69	4.26	4.28	3.82	1.63
57	53	161	58	22.3757	2	F	0	6	4	9.97	8.47	6.3	5.33	-0.18	4.79	4.16	4.37	3.93	1.43
58	53	161	58	22.3757	2	F	1	18	10	9.72	8.84	7.07	6.31	0.33	4.3	2.38	-4.27	-2.54	0.81
59	53	161	58	22.3757	2	F	1	18	10	9.62	8.94	7.12	6.26	0.35	4.4	2.28	-4.47	-2.52	0.86
60	53	161	58	22.3757	2	F	1	18	10	9.82	9.04	7.17	6.21	0.37	4.51	2.18	-4.67	-2.55	0.91
61	53	160	55	21.4844	2	F	0	3	2	9.87	8.67	6.2	5.43	-0.17	4.59	4.36	4.18	3.87	1.53
62	53	160	55	21.4844	2	F	0	3	2	9.77	8.57	6.25	5.38	-0.16	4.69	4.26	4.28	3.82	1.63
63	53	160	55	21.4844	2	F	0	3	2	9.97	8.47	6.3	5.33	-0.18	4.79	4.16	4.37	3.93	1.43
64	53	160	55	21.4844	2	F	1	14	9	9.72	8.84	7.07	6.31	0.33	4.3	2.38	-4.27	-2.54	0.81
65	53	160	55	21.4844	2	F	1	14	9	9.62	8.94	7.12	6.26	0.35	4.4	2.28	-4.47	-2.52	0.86
66	53	160	55	21.4844	2	F	1	14	9	9.82	9.04	7.17	6.21	0.37	4.51	2.18	-4.67	-2.55	0.91
67	60	161	65	25.0762	2	F	0	4	2	10.68	9.81	6.98	5.75	0.54	2.79	2.58	1.2	0.81	0.73
68	60	161	65	25.0762	2	F	0	4	2	10.68	9.81	6.98	5.75	0.54	2.79	2.58	1.2	0.81	0.73
69	60	161	65	25.0762	2	F	0	4	2	10.68	9.81	6.98	5.75	0.54	2.79	2.58	1.2	0.81	0.73
70	60	161	65	25.0762	2	F	0	5	3	9.47	7.32	4.33	3.55	0.19	4.47	3.52	-1.94	-3.06	-0.11
71	60	161	65	25.0762	2	F	0	5	3	9.47	7.32	4.33	3.55	0.19	4.47	3.52	-1.94	-3.06	-0.11
72	60	161	65	25.0762	2	F	0	5	3	9.47	7.32	4.33	3.55	0.19	4.47	3.52	-1.94	-3.06	-0.11
73	62	154	54	22.7694	2	F	0	7	4	11.98	9.07	4.6	2.35	0.12	1.75	-0.95	-2.4	-1.65	0.3
74	62	154	54	22.7694	2	F	0	7	4	11.98	9.07	4.6	2.35	0.12	1.75	-0.95	-2.4	-1.65	0.3
75	62	154	54	22.7694	2	F	0	7	4	11.98	9.07	4.6	2.35	0.12	1.75	-0.95	-2.4	-1.65	0.3
76	62	154	54	22.7694	2	F	0	2	2	9.47	7.32	4.33	3.55	0.19	2.79	2.58	1.2	0.81	0.73
77	62	154	54	22.7694	2	F	0	2	2	9.47	7.32	4.33	3.55	0.19	2.79	2.58	1.2	0.81	0.73
78	62	154	54	22.7694	2	F	0	2	2	9.47	7.32	4.33	3.55	0.19	2.79	2.58	1.2	0.81	0.73
79	49	163	53	19.9481	2	F	0	7	3	11.88	9.08	3.11	2.73	0.12	7.97	6.05	4.47	3.6	1.2
80	49	163	53	19.9481	2	F	0	7	3	11.4	5.77	3.15	4.39	0.56	5.28	4.71	3.68	2.7	1.54
81	49	163	53	19.9481	2	F	1	21	12	10.87	11.14	7.25	6.35	0.53	4.37	3.64	2.68	2.12	8.31
82	49	163	53	19.9481	2	F	1	21	12	11.88	10.99	7.14	5.48	0.53	5.69	4.71	3.68	3.6	1.72
83	61	169	72.5	25.3843	1	M	0	9	0	8.7	7.7	4.81	2.16	0.15	2.03	5.64	3.38	3.24	1.69
84	61	169	72.5	25.3843	1	M	0	9	0	7.75	5.2	4.63	2.37	0.04	4	5.8	3.6	4.22	0.23
85	61	169	72.5	25.3843	1	M	0	9	0	4.23	7.72	5.49	2.4	0.06	4.8	4.83	5.98	3.53	0.59
86	61	169	72.5	25.3843	1	M	0	3	3	6.04	8.98	2.87	2.71	0.05	4.4	3.23	5.16	4.1	1.72
87	61	169	72.5	25.3843	1	M	0	3	3	7.75	7.38	2.92	2.4	0.01	4.37	5.28	5.6	3.91	1.82
88	61	169	72.5	25.3843	1	M	0	3	3	6.46	7.38	4.16	3.82	0.06	5.16	4.47	3.91	2.7	0.89
89	63	158	54	21.6311	2	F	0	9	2	9.46	7.31	4.32	3.54	0.18	4.46	3.51	-1.95	-3.07	-0.12
90	63	158	54	21.6311	2	F	0	8	3	9.45	7.3	4.31	3.53	0.17	4.45	3.5	-1.96	-3.08	-0.13
91	57	155	48	19.9792	2	F	0	13	6	9.47	7.32	4.33	3.55	0.19	4.47	3.52	-1.94	-3.06	-0.11
92	57	155	48	19.9792	2	F	0	9	3	9.23	7.19	4.11	3.21	0.15	4.44	3.28	0.2	0.82	0.18
93	60	158	56	22.4323	1	M	1	13	10	8.85	8.57	4.81	3.53	1.14	6.69	7.07	5.56	4.24	1.46
94	60	158	56	22.4323	1	M	1	13	10	7.95	7.07	3.56	2.84	1.04	2.94	2.1	1.23	1	1.01
95	60	158	56	22.4323	1	M	1	13	10	6.77	6.5	3.76	3.16	1.45	5.4	5.22	3.52	2.83	1.23
96	60	158	56	22.4323	1	M	1	14	10	9.32	8.23	4.61	3.45	0.01	3	2.09	1.45	1.41	1.33
97	60	158	56	22.4323	1	M	1	14	10	9.61	9.14	6.01	4.26	0.21	3.46	1.88	0.62	1.48	0.96
98	60	158	56	22.4323	1	M	1	14	10	8.72	7.72	4.14	2.86	0.01	3.75	1.69	0.15	0.08	0.71
99	54	167	57	20.4382	1	M	0	13	10	7.51	7.23	3.47	2.19	-0.2	5.35	5.73	4.22	2.9	0.12
100	54	167	57	20.4382	1	M	0	13	10	6.61	5.73	2.22	1.5	-0.3	1.6	0.76	-0.11	-0.34	-0.33
101	54	167	57	20.4382	1	M	0	13	10	5.43	5.16	2.42	1.82	0.11	4.06	3.88	2.18	1.49	-0.11
102	54	167	57	20.4382	1	M	1	20	11	10.85	11.12	7.23	6.33	0.51	4.35	3.62	2.66	2.1	8.29
103	54	167	57	20.4382	1	M	1	20	11	11.86	10.97	7.12	5.46	0.51	5.67	4.69	3.66	3.58	1.7
104	54	167	57	20.4382	1	M	1	20	11	-0.02	9.12	-0.02	-0.02	-0.02	-0.02	-0.02	-0.02	-0.02	-0.02
105	70	163	59	22.2063	1	M	0	7	3	11.88	9.08	3.11	2.73	0.12	7.97	6.05	4.47	3.6	1.2
106	70	163	59	22.2063	1	M	0	7	3	11.4	5.77	3.15	4.39	0.56	5.28	4.71	3.68	2.7	1.54
107	70	163	59	22.2063	1	M	1	21	12	10.87	11.14	7.25	6.35	0.53	4.37	3.64	2.68	2.12	8.31
108	70	163	59	22.2063	1	M	1	21	12	11.88	10.99	7.14	5.48	0.53	5.69	4.71	3.68	3.6	1.72
109	70	170	60.5	20.9343	1	M	1	13	7	11.4	11.14	7.25	6.35	0.62	7.73	6.11	5.16	4.79	1.72
110	70	170	60.5	20.9343	1	M	1	13	7	10.13	10.99	7.14	5.48	0.2	6.04	7.46	5.6	4.1	1.54
111	70	170	60.5	20.9343	1	M	1	13	7	9.38	9.14	7.25	5.15	0.01	7.97	6.28	5.98	5.54	1.2
112	70	170	60.5	20.9343	1	M	1	16	8	12.5	11.14	7.14	6.35	0.31	6.01	7.46	5.98	5.54	1.33
113	70	170	60.5	20.9343	1	M	1	16	8	11.24	9.91	7.25	5.51	0.2	6.04	6.11	5.16	4.85	1.2
114	70	170	60.5	20.9343	1	M	1	16	8	10.49	10.99	6.96	5.48	0.16	7.73	6.05	6.64	4.79	1.45
115	76	159	52	20.5688	1	M	0	9	3	8.7	7.7	4.81	2.71	0.06	4.4	5.64	3.38	3.24	0.89
116	76	159	52	20.5688	1	M	0	9	3	7.75	7.38	4.63	2.37	0.04	4.37	4.47	3.6	2.7	0.23
117	76	159	52	20.5688	1	M	0	9	3	6.46	7.72	4.16	2.4	0.01	4.8	4.83	3.91	3.53	0.59
118	76	159	52	20.5688	1	M	1	10	3	11.4	8.63	4.41	3.71	0.31	6.01	4.83	3.48	2.12	0.91
119	76	159	52	20.5688	1	M	1	10	3	10.13	9.01	4.5	4.02	0.16	5.97	4.66	2.36	1.24	0.09
120	76	159	52	20.5688	1	M	1	10	3	9.38	7.56	3.41	3.07	0.31	6.37	6.34	4.17	3.09	0.55
121	63	154	57	24.0344	2	F	0	3	0	6.04	8.98	2.87	2.16	0.05	2.03	3.23	5.16	4.1	1.72
122	63	154	57	24.0344	2	F	0	3	0	7.75	7.38	2.92	2.4	0.15	4	5.28	5.6	3.91	1.82
123	63	154	57	24.0344	2	F	0	3	0	4.23	5.2	5.49	3.82	0.06	5.16	5.8	5.98	4.22	1.69
124	63	154	57	24.0344	2	F	1	16	1	8.7	7.7	3.13	2.71	0.08	5.9	6.11	3.91	2.7	0.52
125	63	154	57	24.0344	2	F	1	16	1	6.68	7.98	4.81	4.33	0.5	4.45	4.47	2.88	2.15	0.24
126	63	154	57	24.0344	2	F	1	16	1	6.44	6.9	4.63	4.21	0.31	3.73	4.47	3.34	2.54	0.04
127	74	160	60	23.4375	2	F	1	9	8	9.49	9.91	7.14	5.48	0.62	5.56	7.46	3.38	4.79	0.3
128	74	160	60	23.4375	2	F	1	9	8	9.92	9.63	4.16	3.04	0.2	4.8	2.03	3.6	3.86	0.53
129	74	160	60	23.4375	2	F	1	9	8	8.98	9.73	4.16	3.25	0.01	5.05	5.46	7.96	5.54	0.97
130	74	160	60	23.4375	2	F	0	14	11	7.85	7.57	3.81	2.53	0.14	5.69	6.07	4.56	3.24	0.46
131	74	160	60	23.4375	2	F	0	14	11	6.95	6.07	2.56	1.84	0.04	1.94	1.1	0.23	0	0.01
132	74	160	60	23.4375	2	F	0	14	11	5.77	5.5	2.76	2.16	0.45	4.4	4.22	2.52	1.83	0.23
133	65	154	57	24.0344	2	F	1	14	10	9.32	8.23	4.61	3.45	0.01	3	2.09	1.45	1.41	1.33
134	65	154	57	24.0344	2	F	1	14	10	9.61	9.14	6.01	4.26	0.21	3.46	1.88	0.62	1.48	0.96
135	65	154	57	24.0344	2	F	1	14	10	8.72	7.72	4.14	2.86	0.01	3.75	1.69	0.15	0.08	0.71
136	65	154	57	24.0344	2	F	0	2	2	9.72	9.05	5.79	4.12	0.74	3	1.1	0.62	1.04	0.89
137	65	154	57	24.0344	2	F	0	2	2	8.32	8.29	6.4	4	0.11	3.94	1.87	1.07	1.04	0.89
138	68	153	54	23.0681	2	F	0	7	3	11.88	9.08	3.11	2.73	0.12	7.97	6.05	4.47	3.6	1.2
139	68	153	54	23.0681	2	F	0	7	3	11.4	5.77	3.15	4.39	0.56	5.28	4.71	3.68	2.7	1.54
140	68	153	54	23.0681	2	F	1	21	12	10.87	11.14	7.25	6.35	0.53	4.37	3.64	2.68	2.12	8.31
141	68	153	54	23.0681	2	F	1	21	12	11.88	10.99	7.14	5.48	0.53	5.69	4.71	3.68	3.6	1.72
142	70	159	54	21.3599	2	F	1	13	7	8.02	9.6	5.88	4.17	0.3	5.69	5.64	4.64	3.53	0.23
143	70	159	54	21.3599	2	F	1	13	7	10.04	10.99	5.64	3.88	0.2	3.74	3.84	4.4	2.95	0.5
144	70	159	54	21.3599	2	F	1	13	7	9.82	10.85	7.25	5.15	0.48	5	6.16	6.64	4.85	0.51
145	70	159	54	21.3599	2	F	0	14	9	5.65	5.19	3.15	2.37	0.6	2.21	2.07	1.7	1.3	0.22
146	70	159	54	21.3599	2	F	0	14	9	6.62	5.2	1.58	0.85	0.11	3	2.11	1.7	1.22	0.01
147	70	159	54	21.3599	2	F	0	14	9	5.75	4.66	2.34	1.47	0.29	3.62	4.04	4.54	3.36	0.58
148	76	159	55.5	21.9532	2	F	1	16	8	12.09	8.35	6.12	5.2	0.22	2.51	-5.84	-7.08	-6.1	-0.2
149	76	159	55.5	21.9532	2	F	1	16	8	11.88	7.7	5.79	4.17	0.12	2.21		0.62
150	76	159	55.5	21.9532	2	F	1	16	8	11.4	7.57	5.49	5.15	0.11	2.03		0.23
151	76	159	55.5	21.9532	2	F	0	9	3	11.98	9.07	4.6	2.35	0.12	1.75	-0.95	-2.4	-1.65	0.3
152	66	158	55.5	22.232	2	F	1	13	7	10.24	9.47	3.29	2.22	0.26	5.64	6.52	7.99	4.65	0.43
153	66	158	55.5	22.232	2	F	1	13	7	10.13	9.05	3.04	2.12	0.22	5.56	6.11	6.93	4.1	0.3
154	66	158	55.5	22.232	2	F	1	13	7	10.3	9.63	3.15	2.32	0.2	5.14	6.28	7.03	4.22	0.27
155	66	158	55.5	22.232	2	F	1	16	8	8.46	5.95	2.98	2.52	0.74	7.24	6.78	9.22	6.93	1.33
156	66	158	55.5	22.232	2	F	1	16	8	8.98	6.07	3.13	2.71	0.71	7.97	6.68	9.33	6.83	1.54
157	66	158	55.5	22.232	2	F	1	16	8	8.7	7.57	3.15	3.88	0.62	7.64	6.88	9.44	7.03	1.45
158	75	169	68	23.8087	1	M	1	21	12	10.87	11.14	7.25	6.35	0.53	4.37	3.64	2.68	2.12	8.31
159	75	169	68	23.8087	1	M	1	21	12	11.88	10.99	7.14	5.48	0.53	5.69	4.71	3.68	3.6	1.72
160	75	169	68	23.8087	1	M	1	21	12		9.14
161	75	169	68	23.8087	1	M	1	21	12	10.24	9.47	3.29	2.22	0.26	5.64	6.52	7.99	4.65	0.43
162	75	169	68	23.8087	1	M	1	21	12	10.13	9.05	3.04	2.12	0.22	5.56	6.11	6.93	4.1	0.3
163	75	169	68	23.8087	1	M	1	21	12	10.3	9.63	3.15	2.32	0.2	5.14	6.28	7.03	4.22	0.27
164	60	164	55	20.4491	2	F	0	6	4	9.87	8.67	6.2	5.43	-0.17	4.59	4.36	4.18	3.87	1.53
165	60	164	55	20.4491	2	F	0	6	4	9.77	8.57	6.25	5.38	-0.16	4.69	4.26	4.28	3.82	1.63
166	60	164	55	20.4491	2	F	0	6	4	9.97	8.47	6.3	5.33	-0.18	4.79	4.16	4.37	3.93	1.43
167	60	164	55	20.4491	2	F	1	18	10	9.72	8.84	7.07	6.31	0.33	4.3	2.38	-4.27	-2.54	0.81
168	60	164	55	20.4491	2	F	1	18	10	9.62	8.94	7.12	6.26	0.35	4.4	2.28	-4.47	-2.52	0.86
169	60	164	55	20.4491	2	F	1	18	10	9.82	9.04	7.17	6.21	0.37	4.51	2.18	-4.67	-2.55	0.91
170	69	174	63	20.8086	1	M	0	3	2	9.87	8.67	6.2	5.43	-0.17	4.59	4.36	4.18	3.87	1.53
171	69	174	63	20.8086	1	M	0	3	2	9.77	8.57	6.25	5.38	-0.16	4.69	4.26	4.28	3.82	1.63
172	69	174	63	20.8086	1	M	0	3	2	9.97	8.47	6.3	5.33	-0.18	4.79	4.16	4.37	3.93	1.43
173	69	174	63	20.8086	1	M	1	14	9	9.72	8.84	7.07	6.31	0.33	4.3	2.38	-4.27	-2.54	0.81
174	69	174	63	20.8086	1	M	1	14	9	9.62	8.94	7.12	6.26	0.35	4.4	2.28	-4.47	-2.52	0.86
175	69	174	63	20.8086	1	M	1	14	9	9.82	9.04	7.17	6.21	0.37	4.51	2.18	-4.67	-2.55	0.91
176	60	157	53	21.5019	2	F	0	4	2	10.68	9.81	6.98	5.75	0.54	2.79	2.58	1.2	0.81	0.73
177	60	157	53	21.5019	2	F	0	5	3	9.47	7.32	4.33	3.55	0.19	4.47	3.52	-1.94	-3.06	-0.11
178	53	167	77	27.6095	1	M	0	7	4	11.98	9.07	4.6	2.35	0.12	1.75	-0.95	-2.4	-1.65	0.3
179	53	167	77	27.6095	1	M	0	2	2	9.47	7.32	4.33	3.55	0.19	2.79	2.58	1.2	0.81	0.73
180	60	170	68	23.5294	1	M	0	7	3	11.88	9.08	3.11	2.73	0.12	7.97	6.05	4.47	3.6	1.2
181	60	170	68	23.5294	1	M	0	7	3	11.4	5.77	3.15	4.39	0.56	5.28	4.71	3.68	2.7	1.54
182	60	170	68	23.5294	1	M	0	7	3
183	60	170	68	23.5294	1	M	1	21	12	10.87	11.14	7.25	6.35	0.53	4.37	3.64	2.68	2.12	8.31
184	60	170	68	23.5294	1	M	1	21	12	11.88	10.99	7.14	5.48	0.53	5.69	4.71	3.68	3.6	1.72
185	60	170	68	23.5294	1	M	1	21	12
186	50	160	76	29.6875	1	M	0	9	0	8.7	7.7	4.81	2.16	0.15	2.03	5.64	3.38	3.24	1.69
187	50	160	76	29.6875	1	M	0	9	0	7.75	5.2	4.63	2.37	0.04	4	5.8	3.6	4.22	0.23
188	50	160	76	29.6875	1	M	0	9	0	4.23	7.72	5.49	2.4	0.06	4.8	4.83	5.98	3.53	0.59
189	50	160	76	29.6875	1	M	0	3	3	6.04	8.98	2.87	2.71	0.05	4.4	3.23	5.16	4.1	1.72
190	50	160	76	29.6875	1	M	0	3	3	7.75	7.38	2.92	2.4	0.01	4.37	5.28	5.6	3.91	1.82
191	50	160	76	29.6875	1	M	0	3	3	6.46	7.38	4.16	3.82	0.06	5.16	4.47	3.91	2.7	0.89
192	41	164	97	36.0648	2	F	0	9	2	9.46	7.31	4.32	3.54	0.18	4.46	3.51	-1.95	-3.07	-0.12
193	41	164	97	36.0648	2	F	0	8	3	9.45	7.3	4.31	3.53	0.17	4.45	3.5	-1.96	-3.08	-0.13
194	58	166	66	23.9512	1	M	0	13	6	9.47	7.32	4.33	3.55	0.19	4.47	3.52	-1.94	-3.06	-0.11
195	58	166	66	23.9512	1	M	0	9	3	9.23	7.19	4.11	3.21	0.15	4.44	3.28	0.2	0.82	0.18
196	64	157	57	23.1247	2	F	1	13	10	8.85	8.57	4.81	3.53	1.14	6.69	7.07	5.56	4.24	1.46
197	64	157	57	23.1247	2	F	1	13	10	7.95	7.07	3.56	2.84	1.04	2.94	2.1	1.23	1	1.01
198	64	157	57	23.1247	2	F	1	13	10	6.77	6.5	3.76	3.16	1.45	5.4	5.22	3.52	2.83	1.23
199	64	157	57	23.1247	2	F	1	14	10	9.32	8.23	4.61	3.45	0.01	3	2.09	1.45	1.41	1.33
200	64	157	57	23.1247	2	F	1	14	10	9.61	9.14	6.01	4.26	0.21	3.46	1.88	0.62	1.48	0.96
201	64	157	57	23.1247	2	F	1	14	10	8.72	7.72	4.14	2.86	0.01	3.75	1.69	0.15	0.08	0.71
202	75	170	86	29.7578	1	M	0	13	10	7.51	7.23	3.47	2.19	-0.2	5.35	5.73	4.22	2.9	0.12
203	75	170	86	29.7578	1	M	0	13	10	6.61	5.73	2.22	1.5	-0.3	1.6	0.76	-0.11	-0.34	-0.33
204	75	170	86	29.7578	1	M	0	13	10	5.43	5.16	2.42	1.82	0.11	4.06	3.88	2.18	1.49	-0.11
205	75	170	86	29.7578	1	M	1	20	11	10.85	11.12	7.23	6.33	0.51	4.35	3.62	2.66	2.1	8.29
206	75	170	86	29.7578	1	M	1	20	11	11.86	10.97	7.12	5.46	0.51	5.67	4.69	3.66	3.58	1.7
207	75	170	86	29.7578	1	M	1	20	11	-0.02	9.12	-0.02	-0.02	-0.02	-0.02	-0.02	-0.02	-0.02	-0.02
208	78	165	65	23.8751	1	M	0	7	3	11.88	9.08	3.11	2.73	0.12	7.97	6.05	4.47	3.6	1.2
209	78	165	65	23.8751	1	M	0	7	3	11.4	5.77	3.15	4.39	0.56	5.28	4.71	3.68	2.7	1.54
210	78	165	65	23.8751	1	M	1	21	12	10.87	11.14	7.25	6.35	0.53	4.37	3.64	2.68	2.12	8.31
211	78	165	65	23.8751	1	M	1	21	12	11.88	10.99	7.14	5.48	0.53	5.69	4.71	3.68	3.6	1.72
212	66	151	51	22.3674	2	F	1	21	12	10.87	11.14	7.25	6.35	0.53	4.37	3.64	2.68	2.12	8.31
213	66	151	51	22.3674	2	F	1	21	12	11.88	10.99	7.14	5.48	0.53	5.69	4.71	3.68	3.6	1.72
214	66	151	51	22.3674	2	F	1	16	8	8.46	5.95	2.98	2.52	0.74	7.24	6.78	9.22	6.93	1.33
215	66	151	51	22.3674	2	F	1	16	8	8.98	6.07	3.13	2.71	0.71	7.97	6.68	9.33	6.83	1.54
216	66	151	51	22.3674	2	F	1	16	8	8.7	7.57	3.15	3.88	0.62	7.64	6.88	9.44	7.03	1.45
